# Supplementary material for: C5: toward better conversation comprehension and contextual continuity for ChatGPT
Source: Springer Nature journal article supplement (doi:10.1007/s12650-024-00980-4), 2024-04-05
Supplement: 12650_2024_980_MOESM2_ESM.pdf [file 12650_2024_980_MOESM2_ESM.pdf]

# C<sup>5</sup>: Towards Better Conversation Comprehension and Contextual Continuity for ChatGPT

## Supplementary material

### Questionnaire

The supporting material in this questionnaire is used to assess participants' understanding and grasp of the conversation history. The questionnaire consists of five multiple-choice questions, with each question carrying 2 points. There is one objective question worth 10 points.

**1: In the pre-training process of GPT-4, which self-supervised learning task was primarily used by the development team? (A)**

- A. Mask language model
- B. Next sentence prediction
- C. Text reconstruction
- D. Contextual word prediction

**2: What does the term "predictable scaling" refer to in the context of the report? (C)**

- A. A method to predict the size of a model
- B. A technique for optimizing model performance at a fixed scale
- C. A model extension method that makes the performance of models at different scales predictable
- D. A method for predicting the number of layers in a model

**3: What is the primary purpose of predicting the performance of the GPT-4 model on the HumanEval dataset? (D)**

- A. To determine the optimal size of the model
- B. To better understand the model's ability level and conduct targeted training and optimization
- C. To compare the performance of GPT-4 with other natural language processing models
- D. To evaluate the effectiveness of the model's training process

**4: What is the primary function of regression models in relation to the HumanEval dataset? (B)**

- A. Explaining the internal structure and operating mechanism of the model
- B. Predicting the pass rate of new models on the HumanEval dataset
- C. Comparing the performance of different models on the HumanEval dataset
- D. Analyzing the effectiveness of the model's training process

**5. Which part discusses the pre-training and post-training of the GPT-4 model? (C)**

- A. 1, 2, 3, 8, 9, 10
- B. 1, 2, 3, 6, 8, 9
- C. 2, 3, 6, 8, 9, 11
- D. 2, 3, 6, 7, 9, 10

**Please carefully read the following conversation between a human and ChatGPT. After reading, you are required to describe the main content of this conversation in a structured way. Note that your description should reflect your understanding of the conversation, not merely repeat the original conversation.**

Requirements:

1. Do not directly copy or paraphrase the original dialogue.
2. Your description should highlight the main theme and key points of the conversation.
3. Your description should include the questions, answers, and any significant clarifications or explanations in the conversation.
4. Your description should be concise, preferably no more than 200 words.

Format:

1. Topic of the Conversation: First, you need to determine the topic of the conversation, which is the main focus or question. For example, "The topic of the conversation is about the impacts of global warming."
2. Dynamics of the Conversation: You need to describe the evolution of the conversation, including stages of question raising, answering, discussion, resolution, etc. For example, "The conversation begins with a human's query about global warming, then ChatGPT gives answers and discussions, and finally, a consensus on the consequences of global warming is reached."
3. Key Information: You should summarize the key information or main points in the conversation. For example, "In the conversation, ChatGPT explained various consequences that global warming might bring, such as rising sea levels, increasing extreme weather events, and decreasing biodiversity."
4. Conclusion or Insights: You need to extract the final conclusion or insights from the conversation. For example, "Finally, both parties reach a consensus, acknowledging that global warming is a serious issue that requires immediate action."

## **Comparison of answers**

This material is intended to compare the quality of answers obtained by using our system with and without the addition of context for the same question. The first answer for each question is without context, while the second answer is obtained with the addition of context.

**Q1. What are the possible long-term consequences of deploying highly complex but poorly interpretable models like GPT-4, and how can the field of AI research address these issues in future model development by prioritizing interpretability?**

**Answer without context**

Poor interpretability in highly complex models like GPT-4 can lead to several long-term consequences. These may include biased or unfair decisions, lack of accountability, potential privacy violations, and a lack of trust from users and stakeholders. To address these issues, the field of AI research should prioritize interpretability in future model development. This can be done by designing models with built-in explainability mechanisms, creating standardized evaluation metrics for interpretability, promoting transparency in model development, and fostering interdisciplinary collaborations to ensure ethical and responsible AI deployment.

**Answer with the addition of context**

The possible long-term consequences of deploying highly complex but poorly interpretable models like GPT-4 can be manifold and can have far-reaching implications across various domains:

**Ethical and Legal Concerns:** Without proper interpretability, the decisions made by these models may not be easily explained or justified. This opacity can lead to ethical and legal challenges, especially in critical domains like healthcare, finance, or law, where decisions made by AI systems can have substantial impacts on human lives.

**Bias and Fairness:** Complex models that are not interpretable can inadvertently propagate biases present in their training data. Such biases can lead to unfair or discriminatory decisions. Without the ability to understand why the model is making certain decisions, it becomes difficult to pinpoint and mitigate these biases.

**Lack of Trust and Adoption:** If users or stakeholders don't understand how decisions are made by an AI system, it may lead to a lack of trust in the technology. This lack of trust can hinder the adoption of AI systems in various industries, even if they are capable of enhancing productivity or solving complex problems.

**Model Debugging and Improvement:** Understanding why a model makes a particular decision is key to improving its performance. Poor interpretability hampers the ability to debug and refine the model, which could lead to stagnation in performance improvements.

**Unforeseen Consequences:** Highly complex models without interpretability could behave unpredictably in scenarios not represented in their training data. This unpredictability can have unintended consequences, and without interpretability, it's difficult to create safeguards against these kinds of events.

To address these issues in future model development, the field of AI research should prioritize interpretability through various means:

**Interpretable Model Architectures:** Focus on developing new model architectures that inherently provide more interpretability. For example, attention mechanisms can sometimes offer insights into which parts of the input data the model focuses on during decision-making.

**Explanation Methods:** Develop methods that can provide explanations for model decisions post-hoc. For example, Local Interpretable Model-agnostic Explanations (LIME) or SHapley Additive exPlanations (SHAP) are techniques that try to explain the predictions of any classifier in an interpretable way.

**Regularization Techniques:** Introduce regularization techniques during training that encourage the model to rely on human-interpretable features for decision-making.

**Human-in-the-loop:** Include human expertise in the training process to guide the model to make decisions that are aligned with human values and understanding. For example, using human feedback to reward models for providing explanations.

**Standardized Evaluation:** Develop standardized metrics and evaluation procedures for assessing the interpretability of models. This would make interpretability a more prominent criterion in model development.

**Legislation and Governance:** Develop and adopt policies that mandate certain levels of transparency and explainability in AI systems, particularly for applications in sensitive areas.

By prioritizing interpretability alongside accuracy and performance, the AI research community can ensure that AI systems are not only powerful but also transparent, ethical, and aligned with human values.

**Q2. Are there any trade-offs between the performance of a complex model like GPT-4 and its interpretability, and how can these trade-offs be balanced?**

**Answer without context**

Yes, there are often trade-offs between the performance of a complex model like GPT-4 and its interpretability. As models become more complex, they can achieve higher performance in terms of accuracy and predictive power. However, this complexity often makes it harder to understand and interpret how the model arrives at its decisions.

To balance these trade-offs, researchers can explore various approaches:

**Simplification:** Simplifying the model architecture or reducing its complexity can enhance

interpretability but may come at the cost of decreased performance.

**Hybrid Models:** Combining complex models with simpler, more interpretable models can provide a balance between performance and interpretability. This way, the complex model can handle complex patterns, while the interpretable model can provide explanations or insights.

**Interpretable Explanations:** Developing techniques to extract explanations from complex models can improve interpretability. This includes methods like feature importance analysis, attention visualization, or rule extraction to understand how the model's decisions are influenced by different input factors.

**Post-hoc Interpretability:** Utilizing post-hoc interpretability techniques can help in understanding the decisions made by complex models without modifying their internal structure. Techniques like LIME (Local Interpretable Model-Agnostic Explanations) or SHAP (Shapley Additive Explanations) can provide insights into individual predictions.

**Standardization:** Promoting the development and adoption of standardized evaluation metrics and benchmarks for interpretability can enable fair comparisons and encourage researchers to prioritize interpretability in model development.

By considering these approaches and striking a balance between performance and interpretability, researchers can mitigate the trade-offs and make complex models like GPT-4 more understandable and trustworthy.

### **Answer with the addition of context**

Yes, there are trade-offs between the performance of a complex model like GPT-4 and its interpretability. These trade-offs arise due to the inherent complexity and non-linearity in the models, which makes them powerful but hard to interpret. Balancing these trade-offs requires careful considerations:

**Model Complexity vs. Interpretability:** Often, as a model becomes more complex, it can capture intricate patterns in data, improving its performance. However, this complexity can come at the cost of interpretability, as it becomes more challenging to understand how the model arrives at specific conclusions. Simpler models like linear regression or decision trees are more interpretable but may not perform as well for complex tasks.

**Accuracy vs. Explanation:** A model optimized for high accuracy might focus on subtle data patterns or correlations that humans might not consider or understand. Making the model's reasoning more aligned with human interpretability might lead to a reduction in accuracy because it's forced to base its decisions on broader features that are easier for humans to understand.

**Generalization vs. Specificity:** Highly complex models might be good at generalizing across various types of data but might not be able to provide specific explanations for individual predictions. On

the other hand, models with built-in interpretability tools might be better at providing specific explanations but may not generalize as well.

To balance these trade-offs:

**Regularization for Simplicity:** Incorporate regularization techniques that penalize complexity in the model. This can help in keeping the model somewhat constrained, balancing between performance and interpretability.

**Hybrid Approaches:** Use a combination of complex models for performance and simpler models for interpretability. For example, an ensemble approach where a complex model makes predictions and a simpler model provides explanations by approximating the complex model's behavior.

**Feature Engineering:** Invest in feature engineering to create more human-understandable features, which a complex model can use. This might make some of the decisions of the model more aligned with human reasoning.

**Interpretable Attention Mechanisms:** For models like GPT-4, attention mechanisms can be critical. Designing attention mechanisms in a way that their outputs or attention weights are interpretable can provide insights into the model's decision-making process.

**Post-hoc Explanation Techniques:** Apply post-hoc explanation techniques like LIME (Local Interpretable Model-agnostic Explanations) or SHAP (SHapley Additive exPlanations) to generate interpretations after the model has made a prediction.

**Human-in-the-loop Evaluation:** Include human evaluators in the model development process to assess not only the model's performance but also the interpretability and validity of its reasoning.

Balancing performance and interpretability is an ongoing challenge and may vary depending on the application. In some domains like healthcare or finance, interpretability might be more critical, while in others, performance might be the priority. It's important to carefully consider the specific requirements and constraints of each application.

**Q3. How can human-in-the-loop evaluation be effectively incorporated into the training pipeline of large language models to improve interpretability?**

**Answer without context**

Incorporating human-in-the-loop evaluation into the training pipeline of large language models can greatly enhance interpretability. Here are some ways to effectively incorporate it:

**Dataset Curation:** Involve human reviewers to curate high-quality datasets that reflect diverse perspectives and minimize biases. By actively involving humans in the dataset creation process, the model can learn from a more balanced and representative set of examples, leading to improved

interpretability.

**Annotation and Explanation Collection:** Human annotators can provide explanations or rationales for their decisions while labeling the data. This additional information can serve as valuable training signals for the model and improve its interpretability.

**Iterative Feedback Loop:** Establish a feedback loop between the model and human reviewers. Collect feedback on model outputs, particularly in cases where the model's decisions are unclear or potentially biased. This iterative process allows the model to learn from human expertise and provides opportunities to refine and improve its interpretability.

**Explanations and Justifications:** Incorporate techniques that generate explanations or justifications for model predictions. Human reviewers can assess the quality and relevance of these explanations, ensuring they align with human reasoning and expectations. This feedback can be used to train the model to generate more interpretable and accurate explanations.

**Model-Agnostic Evaluation:** Use external interpretability methods and tools to evaluate the model's outputs. Human reviewers can compare the model's predictions against their own understanding and provide insights into potential areas of improvement. This evaluation process can help identify shortcomings in the model's interpretability and guide future training iterations.

By integrating human-in-the-loop evaluation at different stages of the training pipeline, large language models can benefit from human expertise, improve their interpretability, and ultimately produce more reliable and transparent results.

### **Answer with the addition of context**

Incorporating human-in-the-loop evaluation into the training pipeline of large language models to improve interpretability can be done through several steps. It's important to remember that this process can be resource-intensive, but it's valuable for refining the model, especially in high-stakes applications where interpretability is crucial.

**Define Interpretability Criteria:** Before involving human evaluators, it's essential to define what interpretability means in the context of the specific task or application. This could involve the clarity of model outputs, the ability to produce explanations, or alignment with human reasoning.

**Interactive Annotation:** During the data annotation phase, human annotators can be asked not only to label data but also to provide rationale or explanations for their labels. This information can be used to train the model to produce similar rationales.

**Iteration and Feedback Loop:** Create an iterative feedback loop where human evaluators interact with the model during its training. They can assess its interpretability by looking at how the model is making decisions and provide feedback, which can be used to make adjustments to the model.

**Explanation Ranking:** Human evaluators can be presented with different explanations generated by the model and asked to rank them based on their quality and interpretability. This feedback can be used as a signal to train the model to produce better explanations.

**Fine-tuning with Human Feedback:** After pre-training, the model can be fine-tuned using human feedback on interpretability. Human evaluators can review the outputs and the reasoning process of the model and provide feedback, which can be integrated into the fine-tuning process.

**Probing Tasks:** Use probing tasks to understand what information the model is capturing. Human evaluators can design tasks that specifically target aspects of interpretability and reasoning to see if the model can perform well on them.

**Validation and Evaluation:** Once the model has been trained, human evaluators should validate its interpretability on new, unseen data. They should assess whether the model's outputs and explanations are understandable and align with human reasoning.

**Real-time Monitoring and Feedback:** Even after deployment, it's important to continuously monitor the model. Human evaluators can be part of this monitoring process, providing feedback in real-time which can be used for ongoing model refinement.

**User Interface for Interpretability:** Develop interfaces that allow human evaluators to interact with the model easily, see what features or data the model is most relying upon, and provide feedback.

**Legal and Ethical Considerations:** Ensure that human-in-the-loop evaluation respects privacy, fairness, and avoids biases. Human evaluators should be trained to recognize and avoid biases and should represent a diverse set of perspectives.

Remember that human-in-the-loop evaluation is not a one-time process but should be continuous, ensuring that as the model evolves, it remains interpretable and aligned with human reasoning and values. It's also important to have a diverse group of human evaluators to avoid biases.

**Q4. How can we validate the model's interpretability on new, unseen data after the model has been trained?**

**Answer without context**

Validating a model's interpretability on new, unseen data after training can be challenging but essential. Here are a few approaches to consider:

**Ground Truth Evaluation:** Compare the model's interpretations or explanations with an established ground truth. This can involve consulting domain experts or utilizing external sources of information to determine the correct explanations for certain inputs. By comparing the model's interpretations against the ground truth, you can assess the model's interpretability.



User Studies: Conduct user studies where individuals interact with the model's outputs and explanations. Gather feedback from users to evaluate the clarity, usefulness, and comprehensibility of the provided explanations. This qualitative assessment can provide insights into how well the model's interpretability aligns with human understanding.

Human Expert Evaluation: Seek evaluations from domain experts or interpreters who possess expertise in the subject matter. These experts can assess the model's explanations for their accuracy, completeness, and relevance. Their evaluations can help identify potential limitations or biases in the model's interpretability.

Adversarial Testing: Introduce intentionally modified inputs or edge cases to evaluate the model's interpretability in challenging scenarios. Assess how the model handles these perturbations and whether its explanations remain consistent and meaningful. Adversarial testing helps identify potential vulnerabilities or weaknesses in the model's interpretability.

Quantitative Evaluation Metrics: Develop quantitative metrics to evaluate interpretability. This can include metrics such as faithfulness (how well the explanations match the model's internal decision-making process), stability (consistency of explanations across similar inputs), and simplicity (how concise and understandable the explanations are). These metrics can provide standardized measures for assessing interpretability.

It's important to note that interpretability is a complex and multifaceted concept, and no single validation method may be sufficient. A combination of approaches, including qualitative assessments, expert evaluations, and quantitative metrics, can provide a more comprehensive understanding of a model's interpretability on new, unseen data.

**Answer with the addition of context**

Validating a model's interpretability on new, unseen data is an essential step in the development of machine learning models, especially in cases where the interpretability is crucial for trust and decision-making. Here are several strategies to validate the interpretability:

**Human Evaluation:** Have human experts or domain specialists review the model's outputs on new data along with the explanations or reasoning provided by the model. Experts should assess whether the explanations are sensible, consistent, and align with domain knowledge.

**Counterfactual Explanations:** Use counterfactual explanations to validate interpretability. Generate examples of input data that are similar to the original but would have led to a different decision by the model. Examine if the model's explanations appropriately reflect the changes in input data.

**Saliency Maps and Feature Attribution:** For models that can produce visual explanations like saliency maps or feature attributions, present these to human evaluators. Check if these visualizations effectively highlight the features that the model is relying upon and if that is consistent with human understanding.

**Use Probing Tasks:** Design specific tasks that target various aspects of interpretability and reasoning. Feed these tasks to the model with the new data and see if the model can perform well on these tasks, and whether its explanations are reasonable.

**Comparison with Simpler Models:** Sometimes a simpler model can serve as a good baseline for interpretability. Compare the complex model's outputs and explanations on new data with those of a simpler model. If the complex model's explanations are not significantly more interpretable than those of the simpler model, this might indicate a problem.

**External Evaluation Metrics:** Utilize external metrics for interpretability. Although interpretability is often subjective, some metrics try to quantify it, such as the LIME (Local Interpretable Model-agnostic Explanations) or SHAP (SHapley Additive exPlanations). These can provide additional validation.

**Sensitivity Analysis:** Perform sensitivity analysis by slightly altering input features and observing the change in output and the corresponding explanations. If small changes in input lead to drastic changes in explanation, this could indicate a lack of stability in interpretability.

**User Studies:** Conduct user studies where a diverse group of individuals interacts with the model using the new data. Collect feedback on whether they find the model's outputs and explanations understandable and trustworthy.

**Real-world Scenario Testing:** Use the model in real-world scenarios with new data and assess whether the explanations provided by the model align with what would be expected in the actual use case.

Remember that interpretability validation should be an iterative process. If the validation process

uncovering issues with interpretability, the model may need to be refined and re-evaluated. Also, it is important to ensure that the validation process considers a diverse range of perspectives to avoid biases in interpretability.
